# Supplementary material for: Prediabetes Is Associated with Increased Prevalence of Sleep-Disordered Breathing
Source: MDPI journal article supplement (doi:10.3390/jcm11051413), 2022-03-04
Supplement: s1 [file s1]

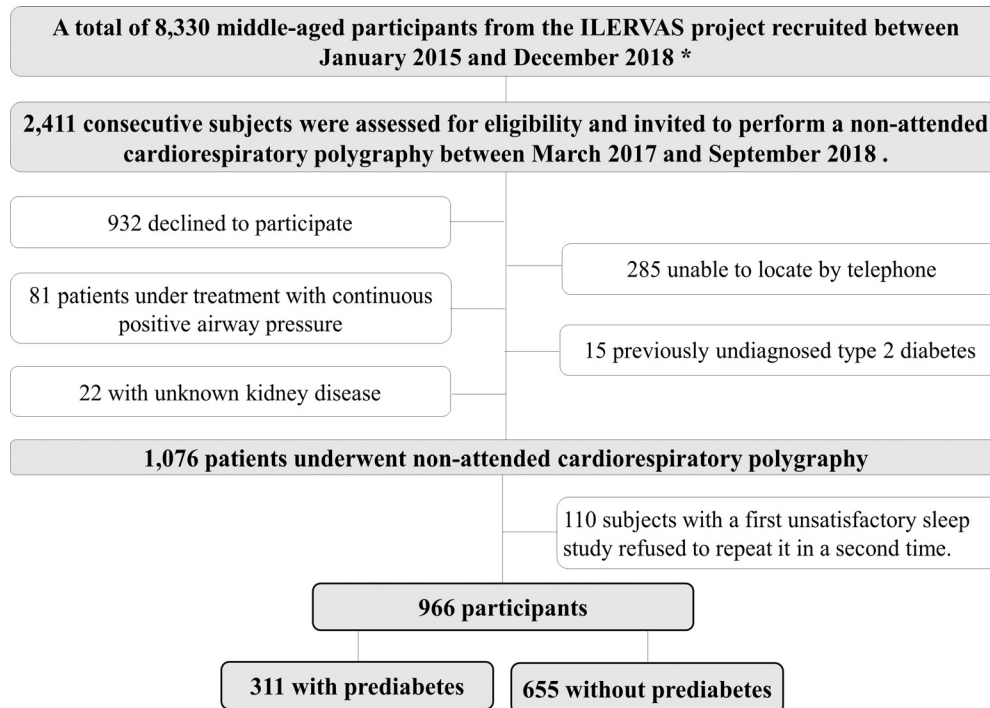

\* The inclusion criteria were women aged between 50 and 70, men aged between 45 and 65, and presence of at least one cardiovascular risk factor (dyslipidemia, hypertension, obesity, smoking and/or having a first degree relative with premature cardiovascular disease). The exclusion criteria were medical history of cardiovascular disease, type 2 diabetes, chronic kidney disease, active neoplasia, a life expectancy less than 18 months, institutionalized population and pregnancy.

**Figure S1.** Flow chart in study population.
